# Supplementary material
Source: publisher figshare collection journal article supplement (https://tandf.figshare.com/articles/dataset/_/12045558)

Figure 3. (a) Paleogeography for the western Billa Kalina Basin; (b) paleogeography for the eastern Billa Kalina Basin with numbered localities and (c) key. Non-standard colours have been used for the units to emphasise facies and rock units within the Neogene and Paleogene. Compiled from Krieg *et al.* (1992, Curdimurka); Cowley and Martin (1991, Kingoonya); Ambrose and Flint (1981a, Billa Kalina); Dalgarno (1982, Andamooka); and Hou (2004, Kingoonya Palaeochannel margins from geophysics). The surface expression of the Kingoonya Palaeochannel was compiled from the author's interpretation of the Kingoonya map sheet. Shoreline features on Andamooka map sheet are shown as trend lines – Watchie Sandstone has not been mapped and Cenozoic units are poorly differentiated on this sheet area. Wells and Callen (1986, figure 15) shows another interpretation of the ridge trends by Callen from satellite data. Lats. and Longs. of boreholes and key features in supplementary data package. PC1, 2, 3, BMR Poole Creek bores.

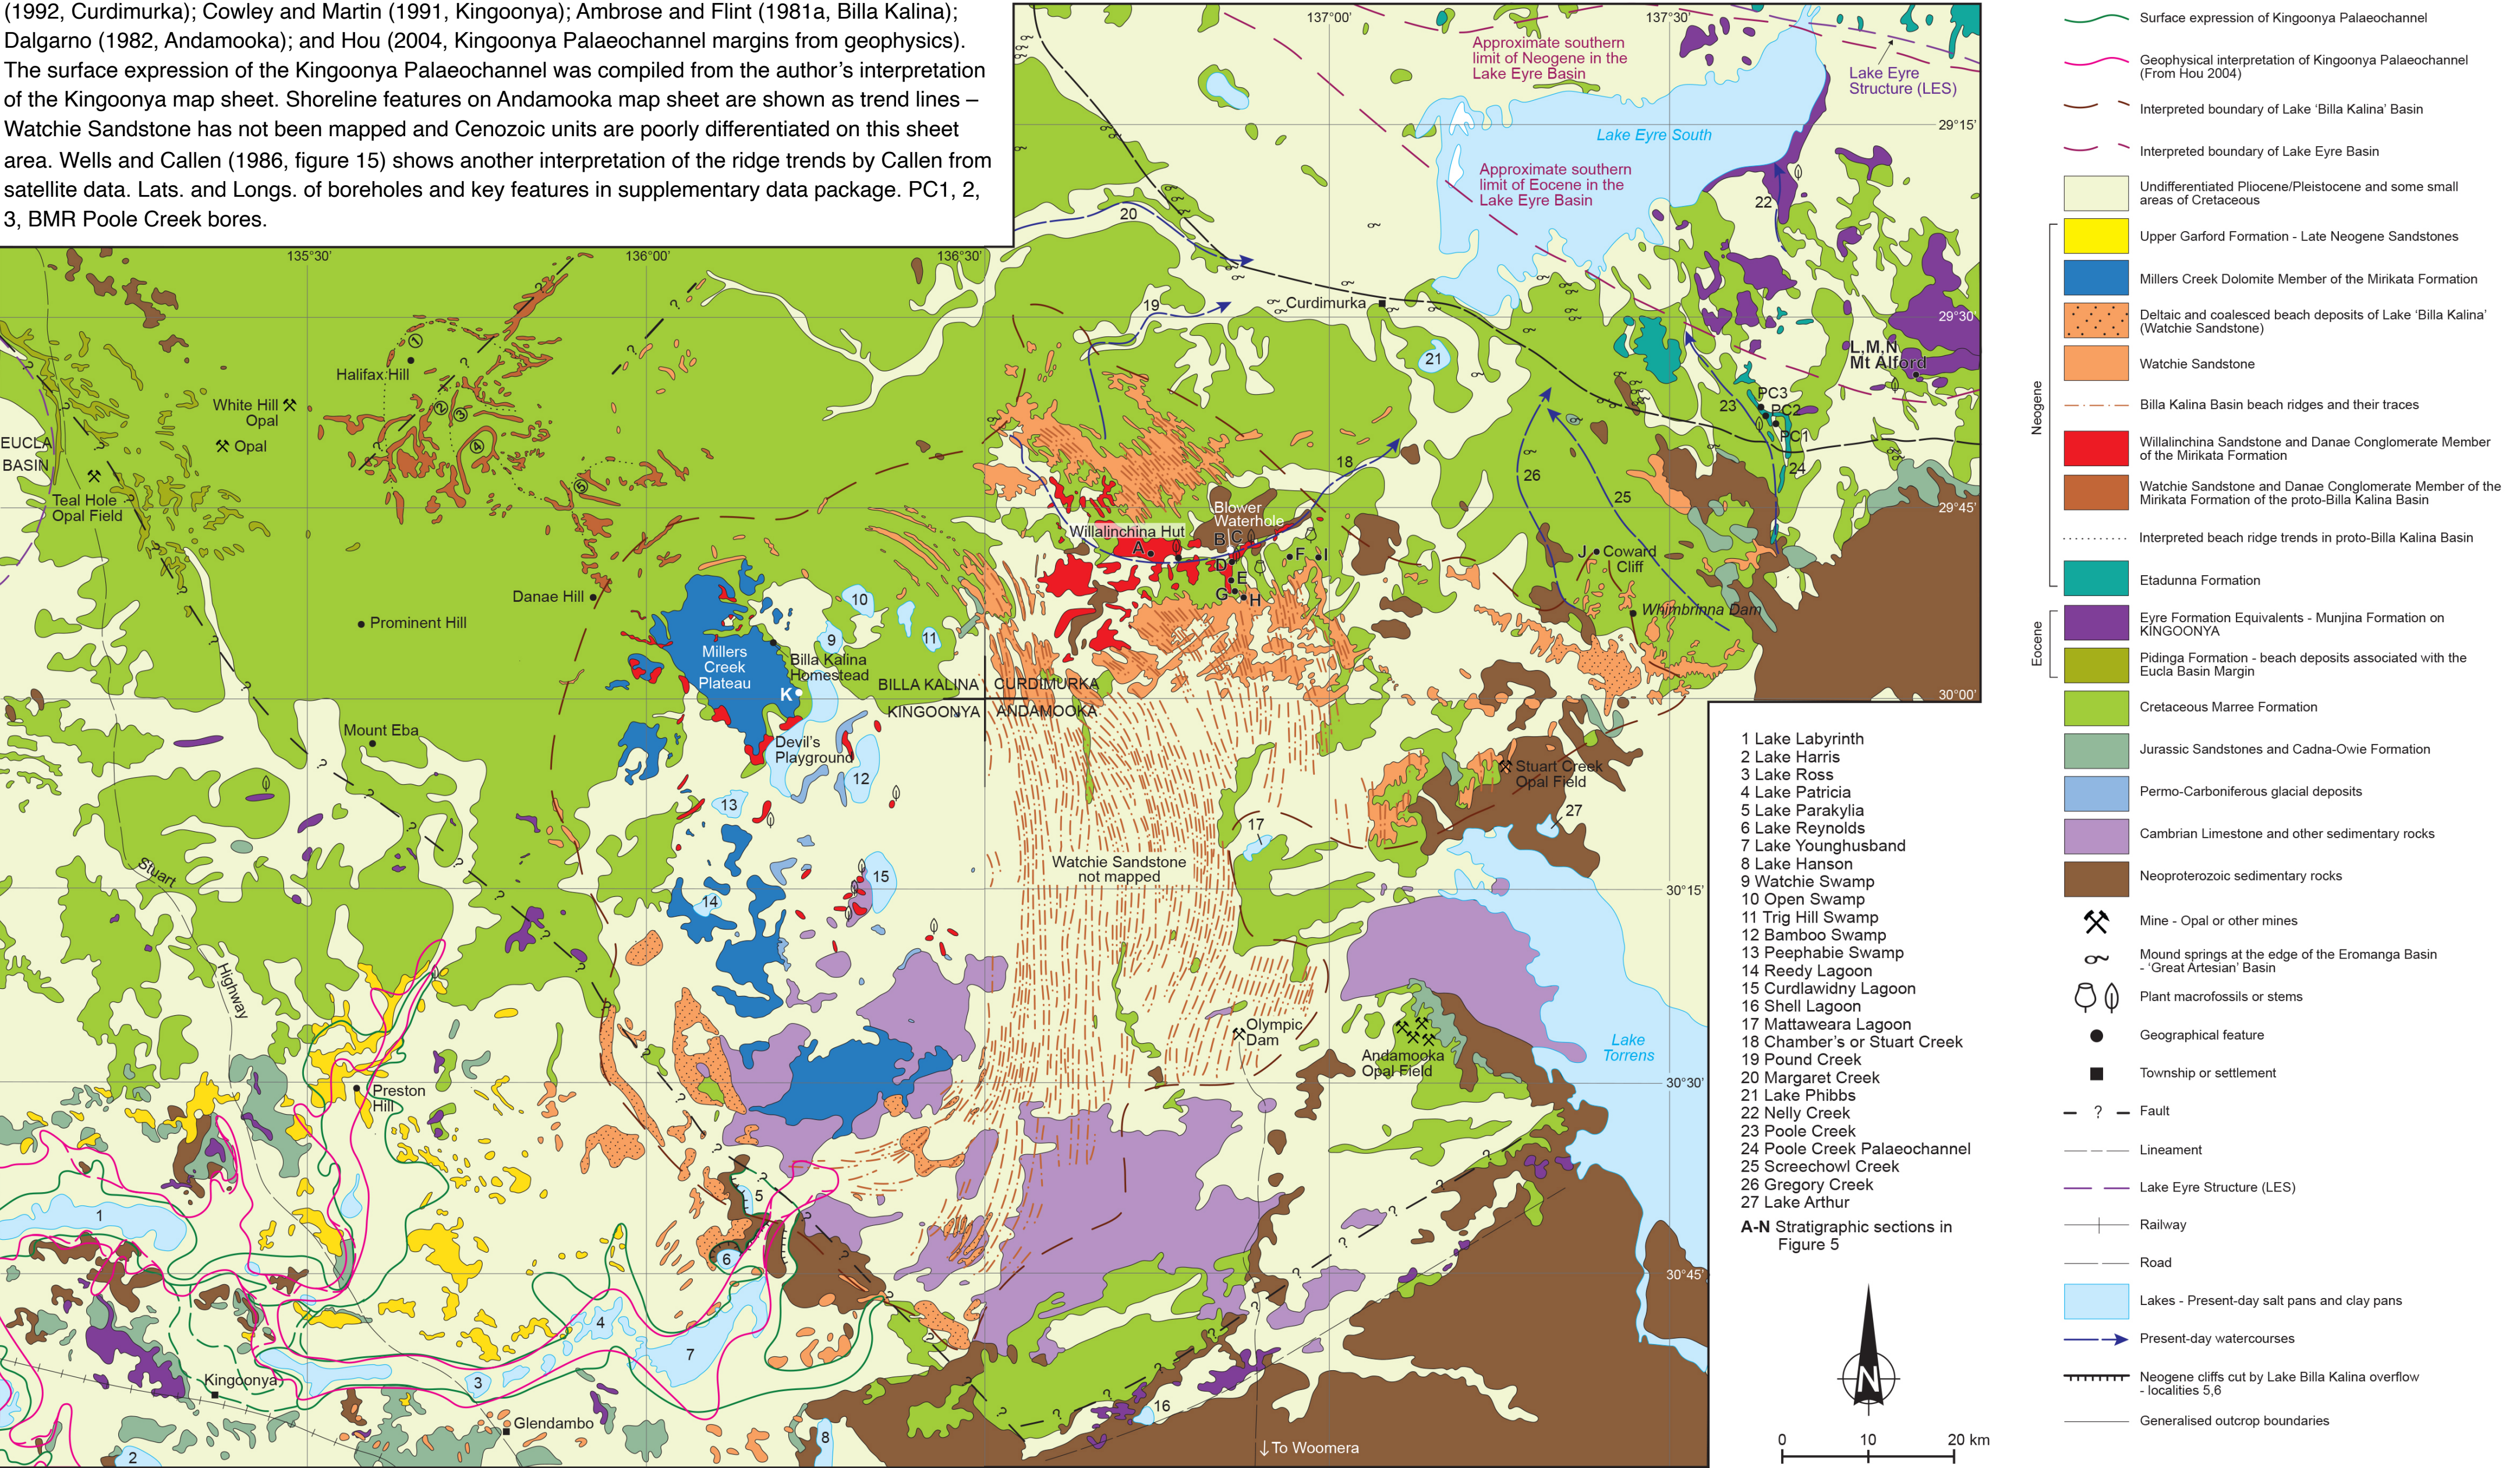

Supplement: Supplementary file 1 [file 1]
