# Supplementary material
Source: publisher figshare collection journal article supplement (https://tandf.figshare.com/articles/dataset/_/12045558)
Supplement: Supplementary file 2 [file 1]

# **Neogene Billa Kalina Basin and Stuart Creek silicified floras, northern South Australia: a reassessment of their stratigraphy, age and environments**

R. A. Callen\*

16 Argus Court, Beerwah, QLD 4519, Australia

\*E-mail Roger Callen: [callenroger@gmail.com](mailto:callenroger@gmail.com)

Received 9 October 2019; accepted 6 February 2020

Editorial handling: Brian Jones

## **SUPPLEMENTARY PAPERS**

*Australian Journal of Earth Sciences* (2020) 67, doi:10.1080/08120099.2020.1736630

---

Copies of Supplementary Papers may be obtained from the Geological Society of Australia's website ([www.gsa.org.au](http://www.gsa.org.au)), the Australian Journal of Earth Sciences website ([www.ajes.com.au](http://www.ajes.com.au)) or from the National Library of Australia's Pandora archive (<https://pandora.nla.gov.au/tep/150555>).

---

## **Supplementary paper**

Latitudes and longitudes of sites mentions in the text (from Google Earth)

Appendix A: NEO contact aureoles (Excel file)

Large versions of Figures 3 and 5.

# Latitudes and longitudes (from Google Earth)

|                                                                                                                                                                                                                                                             | Latitude        | Longitude        |
|-------------------------------------------------------------------------------------------------------------------------------------------------------------------------------------------------------------------------------------------------------------|-----------------|------------------|
| <b>Significant localities</b>                                                                                                                                                                                                                               |                 |                  |
| Willalinchina Hut                                                                                                                                                                                                                                           | 29° 48' 58" S   | 136° 46' 50" E   |
| Section A                                                                                                                                                                                                                                                   | 29° 48' 41.5" S | 136° 44' 25" E   |
| Blower Waterhole                                                                                                                                                                                                                                            | 29° 48' 19" S   | 136° 51' 22" E   |
| Section B                                                                                                                                                                                                                                                   | 29° 48' 11.5" S | 136° 51' 22" E   |
| Section C                                                                                                                                                                                                                                                   | 29° 48' 14.5" S | 136° 51' 28.5" E |
| Section D                                                                                                                                                                                                                                                   | 29° 49' 15.5" S | 136° 51' 29.5" E |
| Section E                                                                                                                                                                                                                                                   | 29° 50' 45" S   | 136° 51' 26" E   |
| Section F                                                                                                                                                                                                                                                   | 29° 48' 54.5" S | 136° 56' 31.5" E |
| Section G                                                                                                                                                                                                                                                   | 29° 51' 38" S   | 136° 51' 46" E   |
| Section H                                                                                                                                                                                                                                                   | 29° 52' 07" S   | 136° 52' 35" E   |
| Section I                                                                                                                                                                                                                                                   | 29° 48' 58" S   | 136° 59' 00.5" E |
| Section J, Coward Cliff                                                                                                                                                                                                                                     | 29° 48' 24.5" S | 137° 23' 36.5" E |
| Billa Kalina Homestead                                                                                                                                                                                                                                      | 29° 55' 31" S   | 136° 11' 15" E   |
| Section K, Millers Creek Plateau                                                                                                                                                                                                                            | 29° 59' 31" S   | 136° 13' 28" E   |
| Sections L, M, N, Mt Alford                                                                                                                                                                                                                                 | 29° 33' 23.5" S | 137° 50' 43.5" E |
| <b>Drill holes</b>                                                                                                                                                                                                                                          |                 |                  |
| BMR Muloorina 2 bore                                                                                                                                                                                                                                        | 29° 08' 57" S   | 137° 53' 38" E   |
| BMR Muloorina 2A bore                                                                                                                                                                                                                                       | 29° 08' 57" S   | 137° 53' 38" E   |
| BMR Poole Creek 1, 1A bores                                                                                                                                                                                                                                 | 29° 07' 64" S   | 137° 39' 06" E   |
| BMR Poole Creek 2 bore                                                                                                                                                                                                                                      | 29° 07' 54" S   | 137° 38' 50" E   |
| BMR Poole Creek 3 bore                                                                                                                                                                                                                                      | 29° 07' 11" S   | 137° 38' 15" E   |
| BMR Palankarinna 1 bore                                                                                                                                                                                                                                     | 29° 45' 56" S   | 138° 23' 41" E   |
| BMR Palankarinna 2 bore                                                                                                                                                                                                                                     | 29° 45' 50" S   | 138° 23' 48" E   |
| SADME Lake Eyre 10 bore: not surveyed – see Johns & Ludbrook (1961, figure 2). The bore lies at 10 miles from bore 0, which is located in the shore of Level Post Bay, Lake Eyre North on the right-hand side of the Goyder Channel, on a bearing of 305° T |                 |                  |
| SADME Lake Eyre 8A bore: (not surveyed: located on air photo and calculated from map)                                                                                                                                                                       | 29° 15' 30" S   | 137° 35' 00" E   |
| SADME Wooltana 1 bore                                                                                                                                                                                                                                       | 30° 35' 00" S   | 134° 34' 15" E   |
| Western Mining WWD1 bore                                                                                                                                                                                                                                    | 30° 30' 31" S   | 137° 45' 32.5" E |
| <b>Other places</b>                                                                                                                                                                                                                                         |                 |                  |
| Billa Kalina Homestead                                                                                                                                                                                                                                      | 29° 55' 00.5" S | 136° 11' 15" E   |
| Eyre's Lookout                                                                                                                                                                                                                                              | 29° 21' 36.5" S | 137° 28' 44" E   |
| Mount Eba                                                                                                                                                                                                                                                   | 30° 03' 38" S   | 135° 35' 53.5" E |
| Muloorina Homestead                                                                                                                                                                                                                                         | 29° 14' 21.5" S | 137° 54' 20" E   |
| Prominent Hill                                                                                                                                                                                                                                              | 29° 01' 04" S   | 137° 05' 16" E   |
| Preston Trig.                                                                                                                                                                                                                                               | 30° 31' 48.5" S | 135° 29' 17" E   |
| Rb/Sr palygorskite date (approx.)                                                                                                                                                                                                                           | 29° 13' 40.5" S | 137° 54' 16.4" E |
| White Cliff                                                                                                                                                                                                                                                 | 29° 50' 35.5" S | 136° 52' 57" E   |
